# Supplementary material
Source: PubMed Central journal article supplement (PMC8013140)
Supplement: 2447_tables.pdf [file 2447_tables.pdf]

**On-line Table 1. Solitaire single device cases**

| Age (yr) (sex) | Syndrome | First NIHSS | Mechanism       | Imaging | Occlusion | ASPECT | Why IA, Not IV    | TT (h:min) | TD (h:min) | Solitaire Passes | Additional Treatment | Complications      | TIMI | Final Review | Final NIHSS | mRS            |
|----------------|----------|-------------|-----------------|---------|-----------|--------|-------------------|------------|------------|------------------|----------------------|--------------------|------|--------------|-------------|----------------|
| 1 55 (F)       | (L) TACS | 17          | Atherosclerosis | CTP/CTA | ICA, M1   | 7      | Late presentation | 3:44       | 1:31       | >3               |                      |                    | 3    | Day 6        | 0           | 0              |
| 2 70 (F)       | (L) TACS | 22          | Atherosclerosis | CTP/CTA | ICA, CTO  | 10     | Obtunded          | 2:03       | 1:43       | 1                |                      | Stent entanglement | 2    | Day 20       | 8           | 4              |
| 3 78 (M)       | (L) TACS | 17          | Atherosclerosis | CTP/CTA | ICA, CTO  | 9      | Sleep onset       | 12:16      | 0:52       | 1                |                      |                    | 3    | Day 24       | 7           | 4              |
| 4 65 (F)       | (R) TACS | 22          | Cardioembolic   | CTP/CTA | CTO       | 10     | Late presentation | 4:22       | 1:01       | >3               |                      |                    | 3    | Day 6        | 0           | 0              |
| 5 64 (M)       | (R) TACS | 20          | Cardioembolic   | CTP/CTA | CTO       | 7      | Sleep onset       | 12:53      | 0:48       | 1                |                      |                    | 3    | 3 Mo         | 9           | 3              |
| 6 88 (F)       | (L) TACS | 22          | Cardioembolic   | CTP/CTA | CTO       | 8      | Late presentation | 3:37       | 1:37       | 2                |                      |                    | 2    | 3 Mo         | 2           | 1              |
| 7 79 (M)       | (L) PACS | 11          | Atherosclerosis | CTP/CTA | M1        | 8      | Late presentation | 3:19       | 0:43       | 1                |                      |                    | 3    | Day 7        | 0           | 0              |
| 8 35 (F)       | (L) TACS | 24          | Unknown         | CTA     | M1        | 10     | Seizure           | 1:41       | 1:05       | 2                |                      |                    | 3    | 3 Mo         | 1           | 1              |
| 9 35 (F)       | POCS     | 3           | Cardioembolic   | MR      | BA        |        | Late presentation | 48:00      | 0:50       | 1                |                      |                    | 3    | 3 Mo         | 0           | 1              |
| 10 37 (M)      | POCS     | 26          | Dissection      | MR      | BA        |        | Late presentation | 11:07      | 1:09       | >3               |                      |                    | 3    | Day 12       | 0           | 1              |
| 11 53 (F)      | POCS     | 16          | Cardioembolic   | CT      | BA        |        | Late presentation | 14:56      | 1:37       | >3               |                      |                    | 2    | Day 35       | 8           | 4              |
| 12 63 (M)      | POCS     | 27          | Cardioembolic   | CT      | BA        |        | Late presentation | 10:05      | 1:21       | >3               |                      |                    | 2    | Day 38       | 9           | 5              |
| 13 74 (F)      | POCS     | 35          | Ischemic        | MR      | BA        |        | During angiogram  | 0:00       | 0:43       | 1                |                      |                    | 3    | 3 Mo         | -           | 5 <sup>a</sup> |
| 14 60 (M)      | POCS     | 16          | Unknown         | MR      | BA        |        | Late presentation | 4:25       | 2:09       | >3               |                      |                    | 2    | Day 21       | 35          | 5              |
| 15 56 (M)      | POCS     | 35          | Dissection      | MR      | BA        |        | Recent stroke     | 5:51       | 1:37       | 2                |                      |                    | 2    | Day 11       | -           | 6              |
| 16 66 (M)      | POCS     | 35          | Dissection      | MR      | BA        |        | Hemorrhage        | 1:09       | 1:19       | 2                |                      |                    | 2    | Day 4        | -           | 6              |

<sup>a</sup> Patient with severe cerebral vasospasm following aneurysmal SAH.

**On-line Table 2. Solitaire, Penumbra, Merci, or urokinase combination cases**

| Age (yr) (sex) | Syndrome | NIHSS <sub>1</sub> | Mechanism       | Imaging | Occlusion | ASPECT | Why IA, Not IV    | TT (h:min) | TD (h:min) | Solitaire Passes | Additional Treatment | Complications  | TIMI | Final Review | Final NIHSS <sub>2</sub> | mRS |
|----------------|----------|--------------------|-----------------|---------|-----------|--------|-------------------|------------|------------|------------------|----------------------|----------------|------|--------------|--------------------------|-----|
| 17 59 (R)      | (L) TACS | 11                 | Dissection      | CTP/CTA | ICA, M2   | 9      | Late presentation | 3:58       | 1:58       | 2                | Penumbra             |                | 2    | 3 Mo         | 0                        | 1   |
| 18 67 (M)      | (L) TACS | 16                 | Atherosclerosis | CTP/CTA | ICA, M2   | 9      | Head injury       | 2:16       | 2:33       | 1                | Urokinase            |                | 3    | 3 Mo         | 0                        | 1   |
| 19 72 (F)      | (R) TACS | 16                 | Cardioembolic   | CTP/CTA | ICA       | 10     | Late presentation | 11:24      | 2:01       | >3               | Penumbra             |                | 2    | Day 14       | 2                        | 2   |
| 20 82 (F)      | (L) TACS | 14                 | Cardioembolic   | CTP/CTA | CTO       | 10     | Late presentation | 3:51       | 2:27       | 2                | Urokinase            | Stent detached | 2    | Day 16       | 5                        | 3   |
| 21 47 (M)      | (L) TACS | 24                 | Unknown         | CTA     | CTO       | 4      | Late presentation | 4:39       | 1:45       | 1                | Merci                | Hemorrhage ICH | 1    | Day 3        | -                        | 6   |
| 22 73 (F)      | (L) TACS | 13                 | Cardioembolic   | CTP/CTA | M1        | 8      | Late presentation | 4:07       | 0:38       | 2                | Penumbra             |                | 3    | Day 14       | 0                        | 0   |
| 23 81 (F)      | (L) TACS | 24                 | Cardioembolic   | CTP/CTA | M1        | 7      | Recent surgery    | 3:07       | 2:33       | 2                | Urokinase            |                | 2    | Day 18       | 10                       | 4   |
| 24 84 (M)      | (L) TACS | 21                 | Cardioembolic   | CTP/CTA | M2, A2    | 8      | Sepsis            | 2:54       | 1:41       | 1                | Penumbra             |                | 2    | 3 Mo         | -                        | 6   |
| 25 66 (F)      | POCS     | 35                 | Cardioembolic   | MR      | BA        |        | Obtunded          | 22:03      | 2:44       | >3               | Urokinase            |                | 2    | 3 Mo         | 12                       | 5   |
| 26 80 (F)      | POCS     | 35                 | Atherosclerosis | CTA     | BA        |        | Obtunded          | 2:39       | 3:01       | 1                | Penumbra             | Hemorrhage SAH | 2    | Day 3        | -                        | 6   |
